# Supplementary material for: Push–pull type alkoxy-wrapped N-annulated perylenes for dye-sensitized solar cells
Source: Royal Society of Chemistry journal article supplement (doi:10.1039/c6ra18221f), 2016-01-01
Supplement: c6ra18221f1.pdf [file c6ra18221f1.pdf]

*Electronic Supplementary Information (ESI) for*

**Push-pull Type Alkoxy-wrapped *N*-annulated Perylenes for Dye-Sensitized Solar Cells**

*Qingbiao Qi,<sup>a‡</sup> Jing Zhang,<sup>b‡</sup> Soumyajit Das,<sup>a</sup> Wangdong Zeng,<sup>a</sup> Jie Luo,<sup>c</sup> Jie Zhang,<sup>c</sup> Peng Wang<sup>\*b</sup> and Jishan Wu<sup>\*a,c</sup>*

<sup>a</sup> Department of Chemistry, National University of Singapore, 3 Science Drive 3, 117543, Singapore. E-mail: chmwuj@nus.edu.sg

<sup>b</sup> Department of Chemistry, Zhejiang University, Hangzhou, 310028, P. R. China. E-mail: pw2015@zju.edu.cn

<sup>c</sup> Institute of Materials Research and Engineering, Agency For Science, Technology And Research (A\*STAR), 2 Fusionopolis Way, Innovis, #08-03, Singapore, 138634.

‡ These authors contributed equally to this work.

**Table of Contents**

|                                                            |     |
|------------------------------------------------------------|-----|
| 1. Synthetic procedures and characterization data .....    | S2  |
| 2. Additional spectra .....                                | S6  |
| 3. DFT calculations.....                                   | S7  |
| 4. Photovoltaic properties.....                            | S13 |
| 5. Appendix: NMR and HR mass spectra of new compounds..... | S14 |

## 1. Synthetic procedures and characterization data

**Compound 5.** To the solution of compound **4** (892 mg, 1.46 mmol) in DCM (200 mL) was slowly added NBS (260 mg, 1.46 mmol) in portion over half an hour at 0 °C. The mixture was stirred at 0 °C for 30 min. The reaction mixture was quenched with water (50 mL). The organic layer was washed with water, and then washed with saturated brine and dried over anhydrous Na<sub>2</sub>SO<sub>4</sub>. The solvent was removed under reduced pressure and the crude product was purified by column chromatography (silica gel, hexanes : DCM = 6 : 1) to give compound **5** as a yellow solid (705 mg, 70%). <sup>1</sup>H NMR (CDCl<sub>3</sub>, 300 MHz): δ ppm = 8.65-8.70 (m, 2H), 8.34 (d, *J* = 8.4 Hz, 1H), 8.13 (d, *J* = 8.4 Hz, 1H), 7.80-7.91 (m, 4H), 7.56 (d, *J* = 8.7 Hz, 1H), 6.63 (s, 2H), 3.91 (t, *J* = 6.3 Hz, 4H), 2.51 (s, 3H), 1.32-1.37 (m, 4H), 0.97-1.03 (m, 4H), 0.82-0.87 (m, 16H), 0.72 (t, *J* = 7.2 Hz, 6H). <sup>13</sup>C NMR (CDCl<sub>3</sub>, 75 MHz): δ ppm = 155.77, 139.69, 133.43, 132.66, 130.74, 130.08, 129.06, 128.22, 125.32, 125.21, 124.75, 124.71, 124.59, 124.54, 123.59, 121.11, 120.77, 119.28, 117.46, 117.29, 116.99, 115.49, 113.73, 106.75, 69.04, 31.50, 28.97, 28.93, 28.89, 25.73, 22.45, 22.38, 13.93. HR-MS (APCI, *m/z*): calcd. for C<sub>43</sub>H<sub>49</sub>BrNO<sub>2</sub> ([M+1]), 690.2941; found, 690.2940 (error: -0.2 ppm).

**Compound 6.** To a solution of **5** (69 mg, 0.1 mmol) in DCM (10 mL) was added several drops of trifluoroacetic acid under argon atmosphere at room temperature. After the mixture was stirred for 10 minutes, *N*-iodosuccinimide (22.4 mg, 0.1 mmol) was added into the mixture. After stirring for half an hour, the mixture was poured into water. The aqueous layer was extracted with DCM, and the combined organic phase was washed with saturated brine and dried over anhydrous Na<sub>2</sub>SO<sub>4</sub>. The solvent was removed under reduced vacuum and the residue was purified by column chromatography (silica gel, DCM: hexane = 1:6) to afford **6** as an yellow solid (49 mg, 60%). <sup>1</sup>H NMR (CDCl<sub>3</sub>, 300 MHz): δ ppm = 8.67-8.71 (m, 2H), 8.36 (d, *J* = 8.4 Hz, 1H), 8.25 (d, *J* = 8.4 Hz, 1H), 8.15 (s, 1H), 7.85-7.92 (m, 3H), 6.63 (s, 2H), 3.95 (t, *J* = 6.3 Hz, 4H), 2.51 (s, 3H), 1.36-1.41 (m, 4H), 0.82-1.00 (m, 20H), 0.70 (t, *J* = 7.2 Hz, 6H). <sup>13</sup>C NMR (CDCl<sub>3</sub>, 75 MHz): δ ppm = 155.58, 140.03, 133.59, 132.76, 130.45, 130.25, 130.13, 129.36, 128.21, 126.17, 125.69, 125.44, 125.15, 124.34, 123.87, 121.61, 121.51, 119.32, 117.91, 117.75, 116.84, 113.04, 106.51, 92.09, 69.02, 31.51, 29.05, 28.97, 28.89, 25.81, 22.44, 22.42, 13.92. HR-MS (APCI, *m/z*): calcd. for C<sub>43</sub>H<sub>48</sub>BrINO<sub>2</sub> ([M+1]), 816.1908; found, 816.1891 (error: - 2.0 ppm).

**Compound 7.** To a suspended solution of **6** (82 mg, 0.1 mmol), 4-ethylnyl-*N,N*-bis(4-(hexyloxy)phenyl)aniline (**2**, 37 mg, 0.08 mmol), and tetrakis(triphenylphosphine)palladium (5.5 mg, 0.005 mmol) in THF (10 mL) was added CuI (2 mg, 0.01 mmol), triethylamine (2 ml) under argon. The reaction mixture was stirred at 70 °C for 24 h. The crude compound was extracted into ethyl acetate, washed with brine and water, and dried over anhydrous sodium sulfate. After removing solvent under reduced pressure, the residue was purified by column chromatography (silica gel,

DCM : hexanes = 1 : 4) to yield a dark yellow solid (52 mg, 45% yield).  $^1\text{H}$  NMR ( $\text{CDCl}_3$ , 500 MHz):  $\delta$  ppm = 8.69-8.72 (m, 2H), 8.56 (d,  $J$  = 8.0 Hz, 1H), 8.34 (d,  $J$  = 8.0 Hz, 1H), 7.88-7.92 (m, 3H), 7.80 (s, 1H), 7.45 (d, 1H), 7.46 (d,  $J$  = 8.5 Hz, 2H), 7.10 (d,  $J$  = 9.0 Hz, 4H), 6.92 (d,  $J$  = 8.5 Hz, 2H), 6.86 (d,  $J$  = 9.0 Hz, 4H), 6.63 (s, 2H), 3.96 (t,  $J$  = 6.5 Hz, 4H), 3.92 (t,  $J$  = 6.5 Hz, 4H), 2.50 (s, 3H), 1.75-1.82 (m, 4H), 1.45-1.49 (m, 4H), 1.35-1.38 (m, 12H), 0.95-1.00 (m, 4H), 0.81-0.94 (m, 22H), 0.66 (t,  $J$  = 6.5 Hz, 6H).  $^{13}\text{C}$  NMR ( $\text{CDCl}_3$ , 125 MHz):  $\delta$  ppm = 155.82, 155.77, 148.59, 140.17, 139.91, 139.62, 133.62, 132.75, 132.28, 130.56, 130.16, 129.76, 128.24, 126.96, 125.39, 125.09, 124.89, 124.55, 124.49, 124.01, 121.39, 121.28, 119.46, 119.19, 119.15, 117.75, 117.56, 117.37, 117.20, 115.35, 114.78, 113.29, 106.63, 93.78, 86.41, 69.03, 68.28, 31.60, 31.52, 29.69, 29.32, 29.01, 28.93, 28.89, 25.79, 25.76, 22.61, 22.43, 22.39, 14.02, 13.94. HR-MS (APCI,  $m/z$ ): calcd. for  $\text{C}_{75}\text{H}_{86}\text{BrN}_2\text{O}_4$  ( $[\text{M}+1]$ ), 1157.5765; found, 1157.5757 (error: -0.7 ppm).

**Compound 10.** A 100 mL Schlenk flask was charged with **7** (115 mg, 0.1 mmol), pinacolborane (63 mg, 0.5 mmol), triethylamine (102 mg, 1.0 mmol),  $\text{PdCl}_2(\text{PPh}_3)_2$  (4 mg, 0.005 mmol) and 1,2-dichloroethane (10 mL) under argon. The reaction mixture was stirred at 90 °C overnight. After removal of the solvent, the crude compound was extracted into ethyl acetate, washed with brine and water, and dried over anhydrous sodium sulfate. The starting material **7** was almost gone, so the residue was used for next step without purification. To the suspension of the residue, **9** (58 mg, 0.12 mmol), and tetrakis(triphenylphosphine)palladium (11.6 mg, 0.01 mmol) in toluene (5 mL) was added potassium carbonate aqueous solution (2 M, 0.4 mL) under argon. The reaction mixture was refluxed for 24 h and then water (5 mL) added. The crude compound was extracted with ethyl acetate three times, followed by washing with brine and water, and dried over anhydrous sodium sulfate. After removing solvent under reduced pressure, the residue was purified by column chromatography (silica gel, ethyl acetate : hexanes = 1 : 50) to yield a viscous red oil (72 mg, 50% yield over two steps).  $^1\text{H}$  NMR ( $\text{CDCl}_3$ , 300 MHz):  $\delta$  ppm = 9.85 (s, 1H), 8.72-8.74 (m, 2H), 8.56 (d,  $J$  = 8.0 Hz, 1H), 8.46 (d,  $J$  = 8.0 Hz, 1H), 7.93(t,  $J$  = 8.0 Hz, 1H), 7.87(t,  $J$  = 8.0 Hz, 1H), 7.81 (s, 1H), 7.73 (s, 1H), 7.61 (s, 1H), 7.44 (d,  $J$  = 8.5 Hz, 2H), 7.32 (s, 1H), 7.09 (d,  $J$  = 9.0 Hz, 4H), 6.92 (d,  $J$  = 8.5 Hz, 2H), 6.86 (d,  $J$  = 9.0 Hz, 4H), 6.64 (s, 1H), 3.90-3.96 (m, 8H), 2.49 (s, 3H), 1.94-1.98 (m, 4H), 1.77-1.81 (m, 4H), 1.45-1.49 (m, 4H), 1.35-1.40 (m, 14H), 1.10-1.23 (m, 14H), 1.08-1.11 (m, 4H), 0.76-0.95 (m, 36H), 0.65 (t,  $J$  = 7.5 Hz, 6H).  $^{13}\text{C}$  NMR ( $\text{CDCl}_3$ , 125 MHz):  $\delta$  ppm = 182.47, 163.02, 157.40, 155.85, 155.82, 149.42, 148.62, 148.40, 142.86, 140.18, 139.87, 134.59, 133.56, 133.29, 132.31, 130.89, 130.57, 129.80, 128.95, 127.83, 127.06, 126.99, 125.13, 124.94, 124.47, 124.21, 123.78, 121.70, 121.25, 121.20, 119.47, 119.16, 118.15, 117.83, 117.56, 117.01, 115.37, 114.79, 113.44, 106.70, 93.96, 88.46, 69.06, 68.31, 54.22, 37.74, 31.63, 31.51, 29.71, 29.6, 29.33, 29.04, 29.00, 28.89, 25.81, 25.77, 24.71, 22.62, 22.59, 22.43, 22.41, 14.04, 13.94. HR-MS (APCI,  $m/z$ ): calcd. for  $\text{C}_{97}\text{H}_{115}\text{N}_2\text{O}_5\text{S}_2$  ( $[\text{M}+1]$ ), 1451.8242; found, 1451.8238 (error: -0.3 ppm).

**QB4.** To a suspended solution of **1** (77 mg, 0.1 mmol), 4-ethylnyl-*N,N*-bis(4-(hexyloxy)phenyl)aniline (**2**, 56 mg, 0.12 mmol), 4-ethylnylbenzoic acid (**3**, 18 mg, 0.12mmol), triethylamine (2 ml) and tetrakis(triphenylphosphine)palladium (5.5 mg, 0.005 mmol) in THF (10 mL) was added CuI (2 mg, 0.01 mmol) under argon. The reaction mixture was stirred at 70 °C for 24 h. The crude compound was extracted into ethyl acetate, washed with brine and water, then acidified with 2 M hydrochloric acid aqueous solution (3 mL) and dried over anhydrous sodium sulfate. After removing solvent under reduced pressure, the residue was purified by flash chromatography with chloroform and methanol/chloroform (1/10, v/v) in turn as the eluent to yield a dark red powder (37 mg, 30%). <sup>1</sup>H NMR (THF-d<sub>8</sub>, 500 MHz): δ ppm = 8.80 (d, *J* = 6.5Hz, 2H), 8.57 (t, *J* = 8.5 Hz, 2H), 8.08 (d, *J* = 7.5 Hz, 2H), 7.89-7.94 (m, 2H), 7.84 (s, 1H), 7.75 (m, 3H), 7.43 (d, *J* = 8.5 Hz, 2H), 7.07 (d, *J* = 9.0 Hz, 4H), 6.88 (m, 6H), 6.79 (s, 2H), 3.93-3.98 (m, 8H), 2.51 (s, 3H), 1.75-1.79 (m, 4H), 1.48-1.51 (m, 4H), 1.29-1.37 (m, 12H), 0.78-0.96 (m, 26H), 0.64 (t, *J* = 7.0 Hz, 6H). <sup>13</sup>C NMR (CDCl<sub>3</sub>, 125 MHz): δ ppm = 163.51, 155.94, 155.83, 148.63, 140.12, 139.98, 134.02, 133.19, 132.30, 131.35, 130.68, 130.16, 129.75, 129.64, 126.99, 125.38, 124.17, 123.89, 121.42, 121.26, 120.16, 119.40, 118.94, 118.85, 118.16, 117.73, 115.34, 114.64, 113.35, 106.75, 94.20, 88.42, 69.07, 68.28, 31.60, 31.53, 29.69, 29.00, 28.92, 25.81, 25.75, 22.61, 22.43, 22.41, 14.03, 13.93. HR-MS (APCI, *m/z*): calcd. for C<sub>84</sub>H<sub>91</sub>N<sub>2</sub>O<sub>6</sub> ([M+1]), 1223.6872; found, 1223.6881 (error: +0.8 ppm). Anal. Calcd for C<sub>84</sub>H<sub>90</sub>N<sub>2</sub>O<sub>6</sub>: C, 82.45; H, 7.41; N, 2.29%. Found: C, 82.43; H, 7.44; N, 2.26%.

**QB5.** To a suspended solution of **7** (58 mg, 0.05 mmol), compound **8** (17 mg, 0.06 mmol), triethylamine (2 ml) and tetrakis(triphenylphosphine)palladium (5.5 mg, 0.005 mmol) in THF (10 mL) was added CuI (2 mg, 0.01 mmol) under argon. The reaction mixture was stirred at 70 °C for 24 h. The crude compound was extracted into ethyl acetate, washed with brine and water, then acidified with 2 M hydrochloric acid aqueous solution (3 mL) and dried over anhydrous sodium sulfate. After removing solvent under reduced pressure, the residue was purified by flash chromatography with chloroform and methanol/chloroform (1/10, v/v) in turn as the eluent to yield a dark red powder (23.7 mg, 35%). <sup>1</sup>H NMR (THF-d<sub>8</sub>, 500 MHz): δ ppm = 8.94 (d, *J* = 8.0 Hz, 1H), 8.1-8.85 (m, 2H), 8.56 (d, *J* = 8.0 Hz, 1H), 8.17-8.23 (m, 4H), 7.92-8.06 (m, 5H), 7.76 (s, 1H), 7.17 (d, *J* = 8.5 Hz, 2H), 7.08 (d, *J* = 8.5 Hz, 4H), 6.88 (m, 6H), 6.81 (s, 2H), 3.94-4.00 (m, 8H), 2.53 (s, 3H), 1.75-1.79 (m, 4H), 1.43-1.51 (m, 4H), 1.36-1.38 (m, 12H), 0.91-0.94 (m, 18H), 0.79-0.81 (m, 8H), 0.56-0.61 (t, *J* = 7.5 Hz, 6H). <sup>13</sup>C NMR (CDCl<sub>3</sub>, 125MHz): δ ppm = 169.02, 156.08, 155.88, 149.02, 140.16, 140.04, 134.24, 132.33, 131.65, 130.50, 129.28, 128.48, 127.01, 125.63, 127.01, 125.63, 125.21, 124.22, 121.46, 121.32, 120.24, 119.43, 119.14, 118.92, 117.83, 115.39, 114.46, 106.83, 94.32, 85.54, 69.14, 68.31, 31.93, 31.62, 31.54, 29.70, 29.36, 29.34, 29.01, 28.95, 28.93, 25.81, 25.77, 22.69, 22.62, 22.42, 14.10, 14.03, 13.92. HR-MS (APCI, *m/z*): calcd. for C<sub>90</sub>H<sub>93</sub>N<sub>4</sub>O<sub>6</sub>S ([M+1]), 1357.6810; found,

1357.6818 (error: +0.6 ppm). Anal. Calcd for C<sub>90</sub>H<sub>92</sub>N<sub>4</sub>O<sub>6</sub>S: C, 79.61; H, 6.83; N, 4.13%. Found: C, 79.64; H, 6.85; N, 4.15%.

**QB6.** To a stirred solution of **11** (43 mg, 0.03 mmol) and cyanoacetic acid (10 mg, 0.12 mmol) in chloroform (5mL) was added piperidine (25 mg, 0.3 mmol). The reaction mixture was refluxed under argon for 18 h and then acidified with 2 M hydrochloric acid aqueous solution (5mL). The crude product was extracted by chloroform, washed with water, and dried over anhydrous sodium sulfate. After removing solvent under reduced pressure, the residue was purified by flash column chromatography with chloroform and methanol/chloroform (1/10, v/v) in turn as the eluent to yield a dark red powder (40 mg, 87%). <sup>1</sup>H NMR (THF-d<sub>8</sub>, 500 MHz): δ ppm= 8.79 (broad, 2H), 8.55 (m, 2H), 8.38 (s, 1H), 7.73-7.92 (m, 5H), 7.49 (s, 1H), 7.44 (d, *J* = 8.5 Hz, 2H), 7.07 (d, *J* = 9.0 Hz, 4H), 6.88 (m, 6H), 6.78 (s, 2H), 3.93-3.99 (m, 8H), 2.49 (s, 3H), 2.05-2.07 (m, 4H), 1.75-1.79 (m, 4H), 1.46-1.51 (m, 4H), 1.22-1.41(m, 14H), 1.20-1.24 (m, 14H), 1.09-1.11 (m, 4H), 0.79-0.86 (m, 36H), 0.64 (t, *J* = 7.5 Hz, 6H). <sup>13</sup>C NMR (THF-d<sub>8</sub>, 75 MHz): δ ppm= 161.49, 156.21, 154.79, 154.38, 147.44, 138.60, 133.52, 132.13, 131.81, 130.63, 129.64, 129.38, 129.17, 128.26, 127.73, 126.31, 125.50, 123.63, 123.40, 122.66, 122.31, 120.45, 119.88, 117.55, 117.35, 116.43, 116.24, 116.08, 115.29, 113.69, 113.17, 111.52, 105.00, 92.37, 86.61, 67.23, 66.36, 52.68, 36.17, 30.18, 30.14, 30.14, 30.07, 28.19, 27.89, 27.62, 27.53, 27.49, 24.42, 24.33, 21.13, 21.07, 20.92, 19.97, 11.98, 11.93. HR-MS (APCI, *m/z*): calcd. for C<sub>100</sub>H<sub>116</sub>N<sub>3</sub>O<sub>6</sub>S<sub>2</sub> ([M+1]), 1518.8300; found, 1518.8295 (error: -0.4 ppm). Anal. Calcd for C<sub>100</sub>H<sub>115</sub>N<sub>3</sub>O<sub>6</sub>S<sub>2</sub>: C, 79.06; H, 7.63; N, 2.77%. Found: C, 79.07; H, 7.66; N, 2.79%.

## 2. Additional spectra

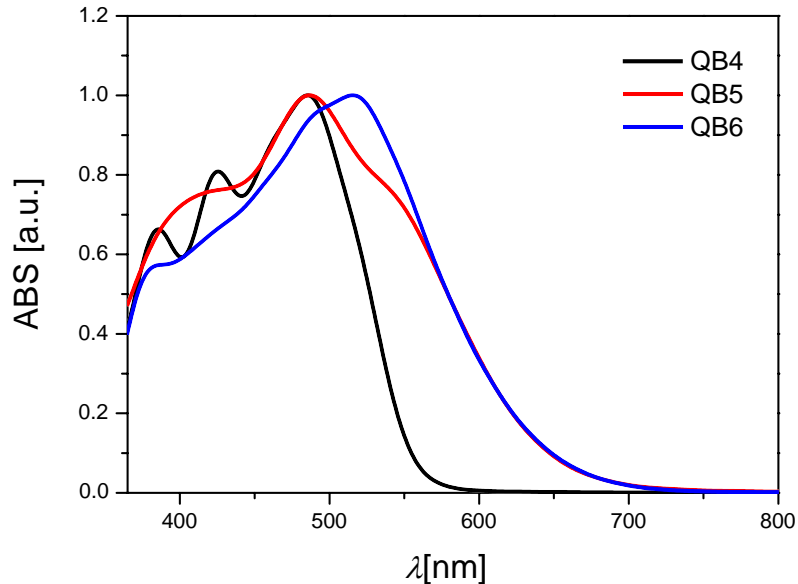

**Fig. S1.** The UV-Vis absorption spectra of **QB4** (black), **QB5** (red) and **QB6** (blue) adsorbed on TiO<sub>2</sub>.

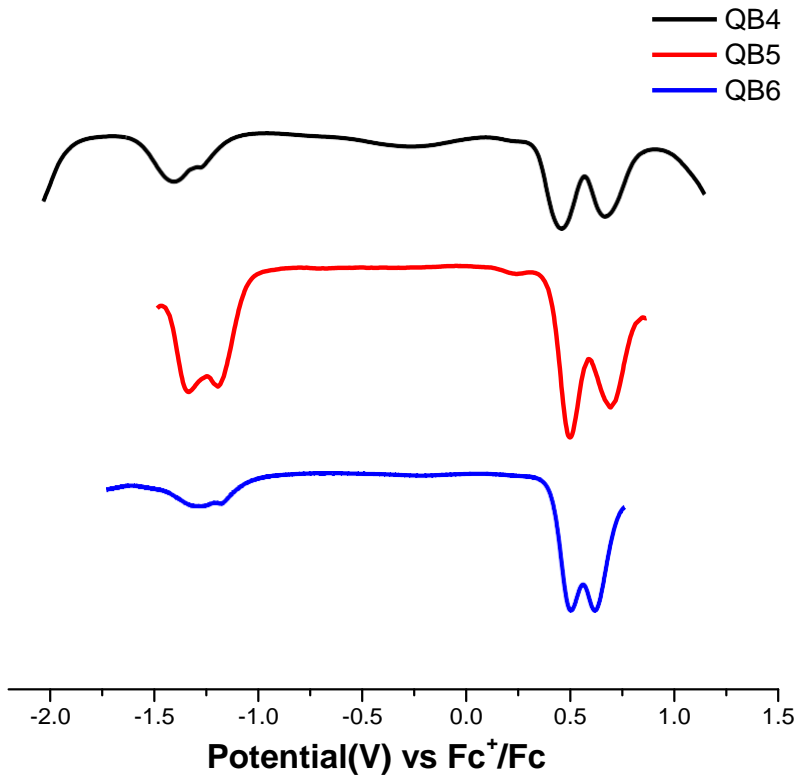

**Fig. S2.** Differential pulse voltammograms recorded in dry DCM with 0.1 M tetra-n-butylammonium hexafluorophosphate (TBAPF<sub>6</sub>) as supporting electrolyte.

### 3. DFT Calculations

The geometries of **QB4-QB6** were optimized using Gaussian 09 package,<sup>1</sup> utilizing the B3LYP level of theory with basis set 6-31G(d), in the gas phase. Excitation energy was computed using time dependent density functional theory (TDDFT) with 6-31G(d) basis set in the B3LYP optimized geometry. Molecular orbital contributions were determined using GaussSum 3.0 package.<sup>2</sup> Hydrogen atoms are omitted for clarity.

**Table S1.** Optimized geometry, calculated HOMO and LUMO profiles and energy levels of **QB4** (B3LYP/6-31G\*).

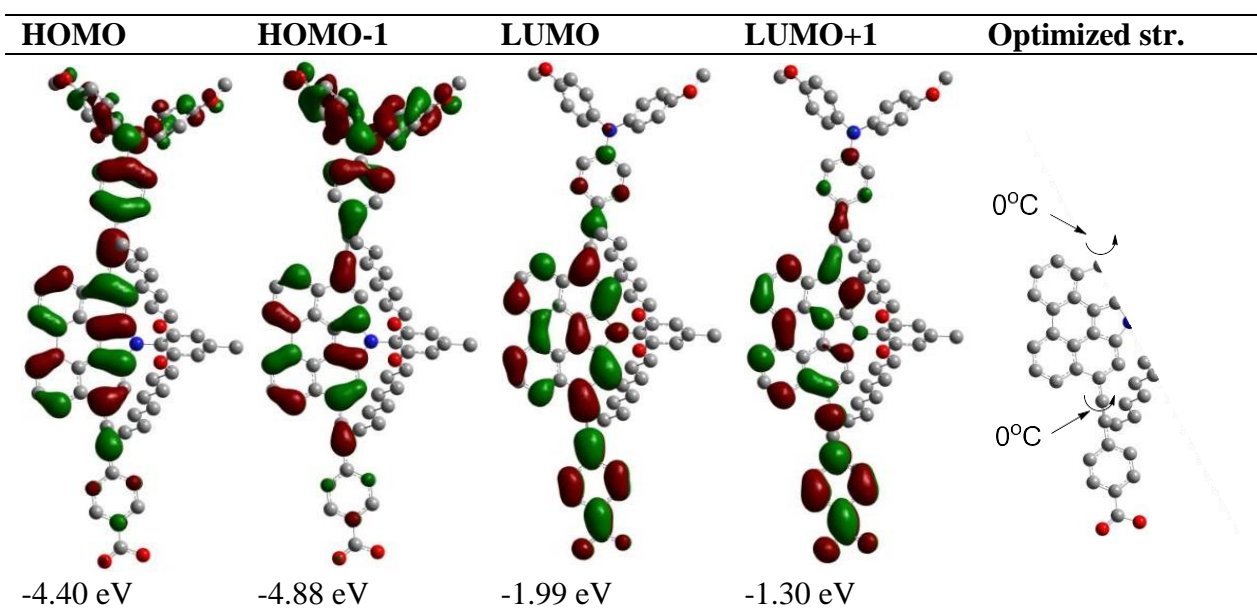

**Table S2.** Optimized geometry, calculated HOMO and LUMO profiles and energy levels of **QB5** (B3LYP/6-31G\*).

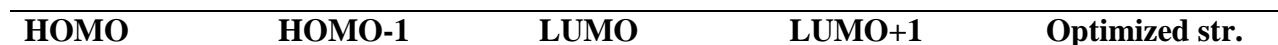

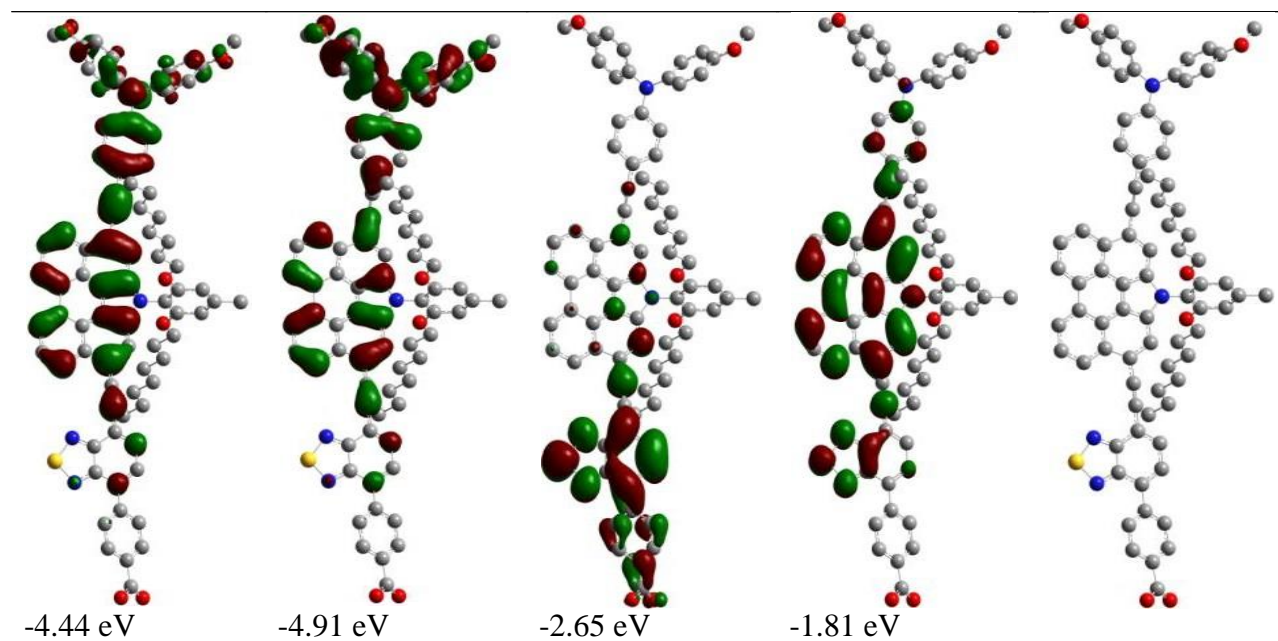

**Table S3.** Optimized geometry, calculated HOMO and LUMO profiles and energy levels of **QB6** (B3LYP/6-31G\*).

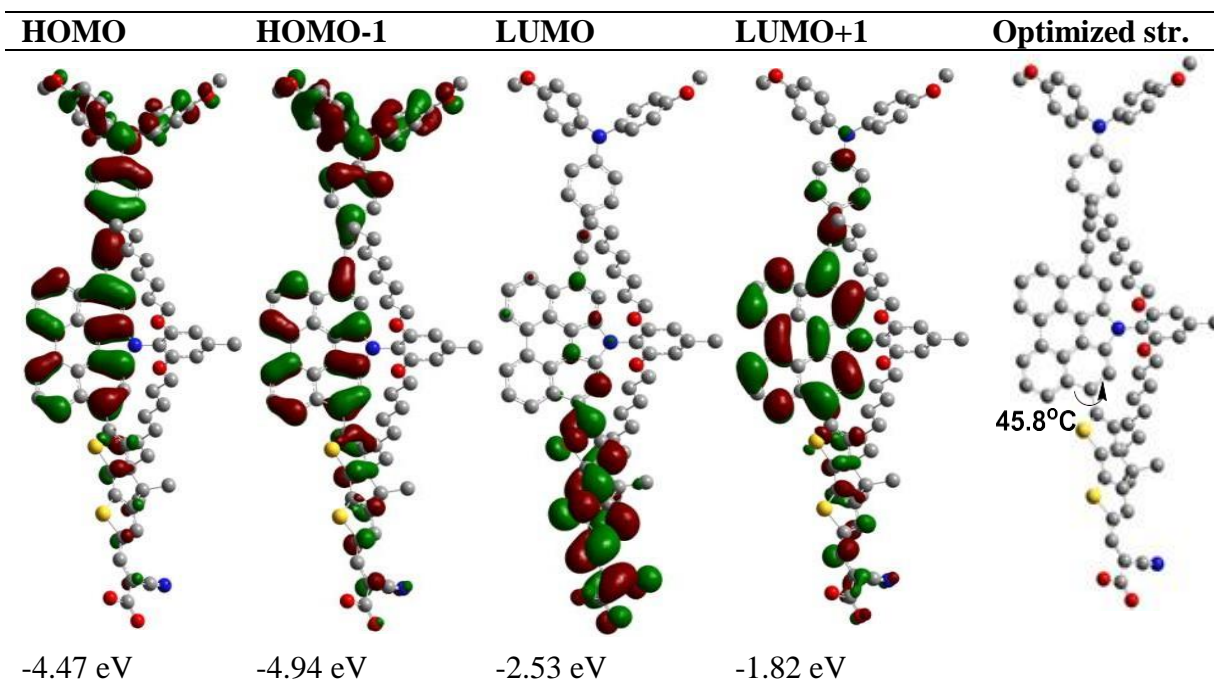

**Table S4.** TD-DFT (B3LYP/6-31G\*) calculated energies, oscillator strength ( $f$ ) and compositions of major electronic transitions of **QB4**.



| Energy (cm <sup>-1</sup> ) | Wavelength (nm) | <i>f</i> | Major contributions                             |
|----------------------------|-----------------|----------|-------------------------------------------------|
| 17703.18544                | 564.8700927     | 1.6204   | HOMO→LUMO (99%)                                 |
| 21583.5456                 | 463.3159067     | 0.2077   | H-1→LUMO (98%)                                  |
| 22794.99872                | 438.6927204     | 0.0288   | HOMO→L+1 (95%)                                  |
| 24639.60144                | 405.8507206     | 0.0744   | H-2→LUMO (91%)                                  |
| 26442.26304                | 378.1824568     | 0.4494   | HOMO→L+2 (91%)                                  |
| 26890.7104                 | 371.8756348     | 0.0161   | H-1→L+1 (91%)                                   |
| 28410.26944                | 351.9853981     | 0.012    | H-1→L+3 (12%), HOMO→L+3 (84%)                   |
| 28803.06416                | 347.1852836     | 0.0778   | H-4→LUMO (28%), H-3→LUMO (57%)                  |
| 29033.74032                | 344.4268596     | 0.119    | H-5→LUMO (22%), H-4→LUMO (45%), H-3→LUMO (25%)  |
| 29182.14736                | 342.6752623     | 0.1264   | H-5→LUMO (75%), H-4→LUMO (14%)                  |
| 29506.38448                | 338.909703      | 0.0016   | HOMO→L+4 (82%)                                  |
| 30218.57696                | 330.9222672     | 0.0557   | H-2→L+1 (61%), H-1→L+2 (15%)                    |
| 30602.49952                | 326.7706938     | 0.0368   | H-7→LUMO (24%), H-1→L+2 (48%)                   |
| 30788.00832                | 324.8017831     | 0.0123   | H-7→LUMO (55%), H-2→L+1 (22%), H-1→L+2 (13%)    |
| 31211.45232                | 320.3952158     | 0.0127   | H-1→L+2 (13%), HOMO→L+5 (22%), HOMO→L+6 (36%)   |
| 31665.5456                 | 315.8006537     | 0.0812   | H-6→LUMO (14%), H-1→L+7 (10%), HOMO→L+7 (72%)   |
| 32037.36976                | 312.1354866     | 0.0008   | HOMO→L+5 (61%), HOMO→L+6 (28%)                  |
| 32125.2848                 | 311.2812871     | 0.0285   | H-6→LUMO (82%), HOMO→L+7 (12%)                  |
| 32268.04592                | 309.9041084     | 0.0012   | H-8→LUMO (40%), HOMO→L+6 (13%), HOMO→L+10 (19%) |
| 32531.79104                | 307.3916216     | 0.0337   | H-1→L+3 (12%), HOMO→L+8 (20%),                  |

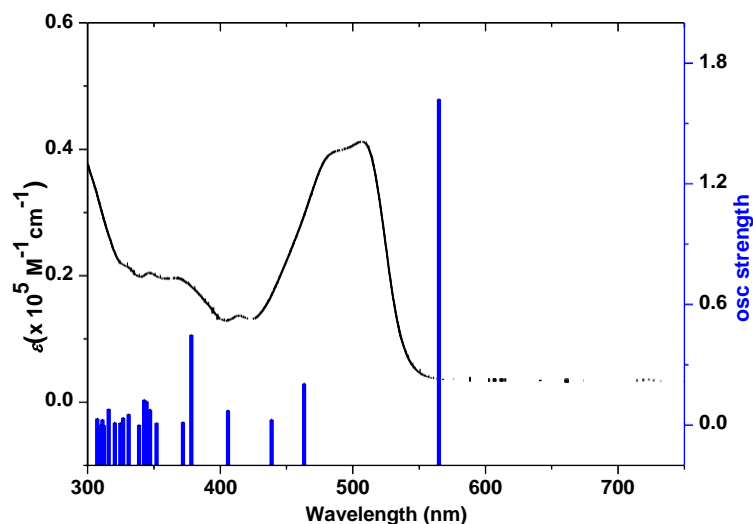

**Fig. S3.** UV-Vis spectrum and calculated stick spectrum for **QB4**.

**Table S5.** TD-DFT (B3LYP/6-31G\*) calculated energies, oscillator strength ( $f$ ) and compositions of major electronic transitions of **QB5**.

| Energy (cm <sup>-1</sup> ) | Wavelength (nm) | $f$    | Major contributions                                             |
|----------------------------|-----------------|--------|-----------------------------------------------------------------|
| 12867.05168                | 777.1788168     | 0.7871 | HOMO→LUMO (99%)                                                 |
| 16704.66416                | 598.6352018     | 0.0871 | H-1→LUMO (98%)                                                  |
| 19064.65872                | 524.5307638     | 1.2649 | HOMO→L+1 (96%)                                                  |
| 20543.0832                 | 486.7818478     | 0.0127 | H-2→LUMO (98%)                                                  |
| 22358.64976                | 447.2541995     | 0.0505 | H-3→LUMO (57%), HOMO→L+2 (34%)                                  |
| 22896.62528                | 436.7455849     | 0.1381 | H-1→L+1 (69%), HOMO→L+2 (22%)<br>H-3→LUMO (26%), H-1→L+1 (25%), |
| 23470.08944                | 426.0742178     | 0.023  | HOMO→L+2 (41%)                                                  |
| 24656.5392                 | 405.5719223     | 0.0431 | H-4→LUMO (91%)                                                  |
| 25218.71152                | 396.5309644     | 0.0002 | H-5→LUMO (99%)                                                  |
| 26059.9536                 | 383.7305374     | 0.0718 | H-2→L+1 (75%), HOMO→L+3 (15%)                                   |
| 26660.03424                | 375.0932917     | 0.463  | H-2→L+1 (12%), HOMO→L+3 (72%)                                   |
| 27081.05856                | 369.2617841     | 0.0337 | H-1→L+2 (92%)                                                   |
| 27223.81968                | 367.3253833     | 0.0015 | H-7→LUMO (94%)                                                  |
| 27657.74896                | 361.5623243     | 0.0006 | H-6→LUMO (100%)                                                 |
| 28140.8784                 | 355.3549345     | 0.0238 | HOMO→L+4 (65%)                                                  |
| 28469.14832                | 351.2574345     | 0.0135 | H-1→L+5 (13%), HOMO→L+5 (83%)                                   |
| 28807.09696                | 347.13668       | 0.0117 | H-8→LUMO (71%), H-3→L+1 (17%)                                   |

|             |             |        |                                |
|-------------|-------------|--------|--------------------------------|
| 28949.85808 | 345.4248367 | 0.0197 | H-8→LUMO (15%), H-3→L+1 (62%)  |
| 29478.15488 | 339.2342581 | 0.0047 | H-9→LUMO (46%), HOMO→L+7 (28%) |
| 29816.10352 | 335.38923   | 0.0305 | H-9→LUMO (19%), HOMO→L+7 (55%) |

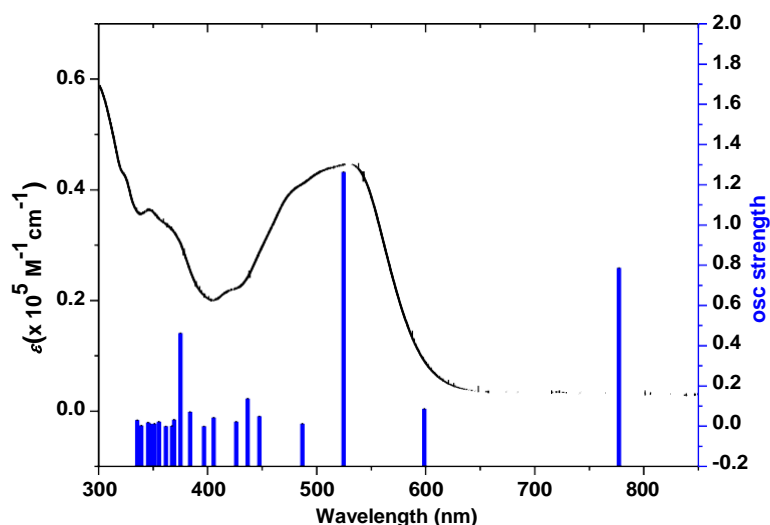

Fig. S4. UV-Vis spectrum and calculated stick spectrum for **QB5**.

Table S6. TD-DFT (B3LYP/6-31G\*) calculated energies, oscillator strength ( $f$ ) and compositions of major electronic transitions of **QB6**.

| Energy (cm <sup>-1</sup> ) | Wavelength (nm) | $f$    | Major contributions                                           |
|----------------------------|-----------------|--------|---------------------------------------------------------------|
| 14048.66208                | 711.8115549     | 0.7166 | HOMO→LUMO (99%)                                               |
| 17972.57648                | 556.403252      | 0.3114 | H-1→LUMO (97%)                                                |
| 19202.58048                | 520.7633427     | 1.1229 | HOMO→L+1 (91%)                                                |
| 22163.46224                | 451.1930443     | 0.0601 | H-3→LUMO (79%), H-2→LUMO (13%)                                |
| 22583.68                   | 442.7976309     | 0.3385 | H-3→LUMO (19%), H-2→LUMO (38%), H-1→L+1 (38%)                 |
| 23790.29376                | 420.3394923     | 0.1337 | H-2→LUMO (39%), H-1→L+1 (53%)                                 |
| 25943.80896                | 385.4484134     | 0.0257 | H-4→LUMO (46%), H-2→L+1 (11%), HOMO→L+2 (23%), HOMO→L+3 (14%) |
| 26164.8064                 | 382.1927763     | 0.0423 | H-4→LUMO (43%), HOMO→L+2 (37%)                                |
| 26231.75088                | 381.217405      | 0.1818 | H-3→L+1 (38%), HOMO→L+3 (42%)                                 |
| 26712.46064                | 374.3571262     | 0.0003 | H-5→LUMO (98%)                                                |
| 26946.36304                | 371.1075957     | 0.408  | H-3→L+1 (25%), HOMO→L+2 (26%), HOMO→L+3 (34%)                 |
| 27014.92064                | 370.1658107     | 0.0266 | H-3→L+1 (19%), H-2→L+1 (66%)                                  |

|             |             |        |                                               |
|-------------|-------------|--------|-----------------------------------------------|
| 28530.44688 | 350.5027468 | 0.0126 | H-1→L+4 (12%), HOMO→L+4 (83%)                 |
| 28701.4376  | 348.4146035 | 0.0011 | H-7→LUMO (93%)                                |
| 28707.89008 | 348.3362926 | 0.001  | H-6→LUMO (95%)                                |
| 29328.13472 | 340.9695194 | 0.0168 | HOMO→L+5 (81%)                                |
| 30122.59632 | 331.976696  | 0.0066 | H-8→LUMO (50%), H-1→L+2 (23%)                 |
| 30291.97392 | 330.120448  | 0.163  | H-4→L+1 (17%), H-1→L+3 (60%)                  |
| 30499.25984 | 327.8768092 | 0.0006 | H-9→LUMO (31%), H-4→L+1 (10%), H-1→L+2 (38%)  |
| 30950.93344 | 323.0920327 | 0.013  | H-9→LUMO (26%), H-4→L+1 (30%), HOMO→L+7 (18%) |

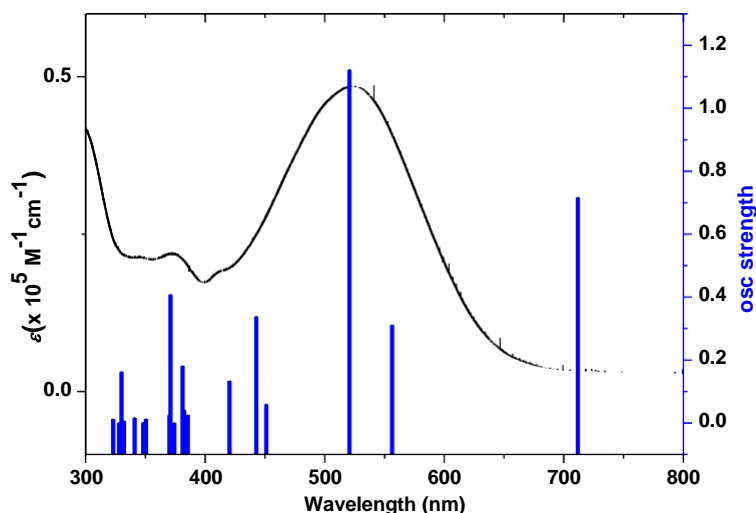

**Fig. S5.** UV-Vis spectrum and calculated stick spectrum for **QB6**.

*Reference:*

(11) *Gaussian 09*, Revision D.01, Frisch, M. J.; Trucks, G. W.; Schlegel, H. B.; Scuseria, G. E.; Robb, M. A.; Cheeseman, J. R.; Scalmani, G.; Barone, V.; Mennucci, B.; Petersson, G. A.; Nakatsuji, H.; Caricato, M.; Li, X.; Hratchian, H. P.; Izmaylov, A. F.; Bloino, J.; Zheng, G.; Sonnenberg, J. L.; Hada, M.; Ehara, M.; Toyota, K.; Fukuda, R.; Hasegawa, J.; Ishida, M.; Nakajima, T.; Honda, Y.; Kitao, O.; Nakai, H.; Vreven, T.; Montgomery, J. A., Jr.; Peralta, J. E.; Ogliaro, F.; Bearpark, M.; Heyd, J. J.; Brothers, E.; Kudin, K. N.; Staroverov, V. N.; Kobayashi, R.; Normand, J.; Raghavachari, K.; Rendell, A.; Burant, J. C.; Iyengar, S. S.; Tomasi, J.; Cossi, M.; Rega, N.; Millam, J. M.; Klene, M.; Knox, J. E.; Cross, J. B.; Bakken, V.; Adamo, C.; Jaramillo, J.; Gomperts, R.; Stratmann, R. E.; Yazyev, O.; Austin, A. J.; Cammi, R.; Pomelli, C.; Ochterski, J. W.; Martin, R. L.; Morokuma, K.; Zakrzewski, V. G.; Voth, G. A.; Salvador, P.; Dannenberg, J. J.;

Dapprich, S.; Daniels, A. D.; Farkas, Ö.; Foresman, J. B.; Ortiz, J. V.; Cioslowski, J.; Fox, D. J. Gaussian, Inc., Wallingford CT, 2013.

(2) N.M. O'Boyle, A.L. Tenderholt and K.M. Langner. *J. Comp. Chem.* 2008, **29**, 839-845.

#### 4. Photovoltaic properties

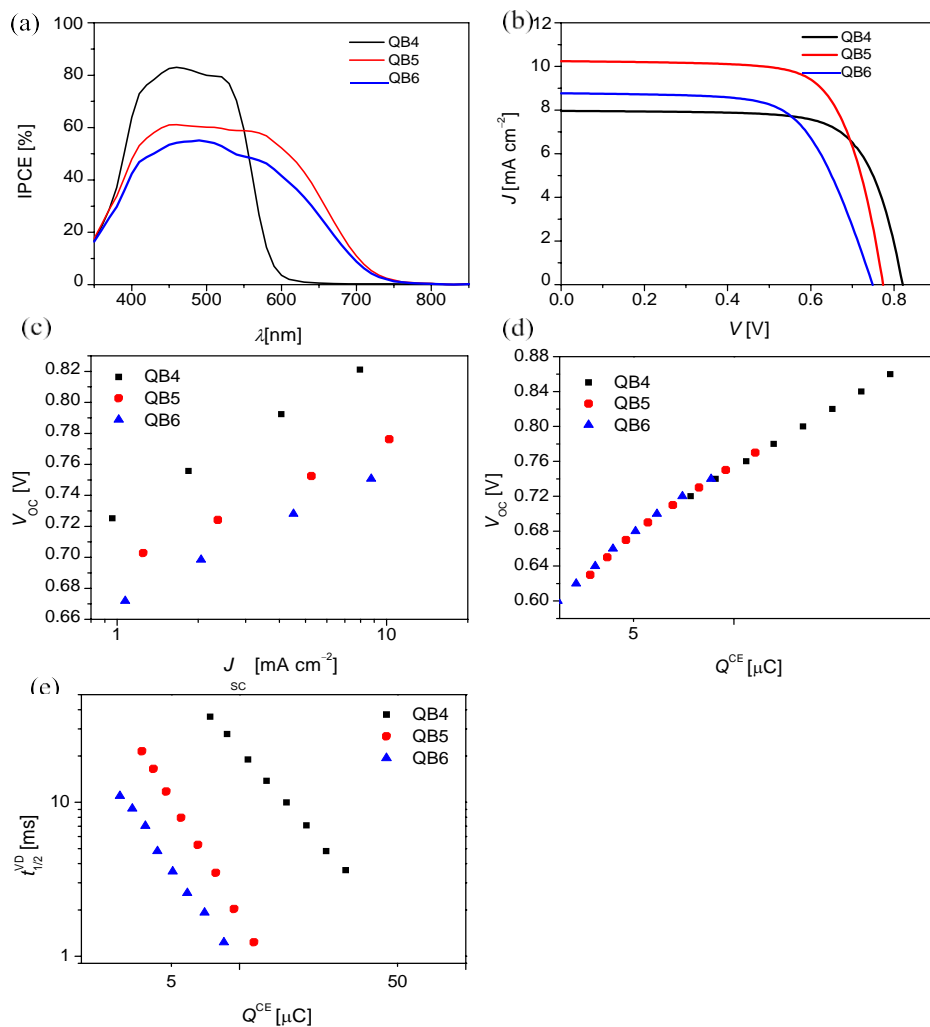

**Fig. S6.** (a) IPCEs spectra and (b) Current-voltage characteristics (c) Open-circuit photovoltage plotted as a function of short-circuit photocurrent density. (d) Plots of open-circuit photovoltage versus extracted charge. (e) Plots of lifetime of photoinjected electrons in titania as a function of extracted charge recorded for DSCs devices fabricated with the three dyes without the presence of CDCA.



Fig. S8.  $^{13}\text{C}$  NMR spectrum (75 MHz,  $\text{CDCl}_3$ ) of **5**.

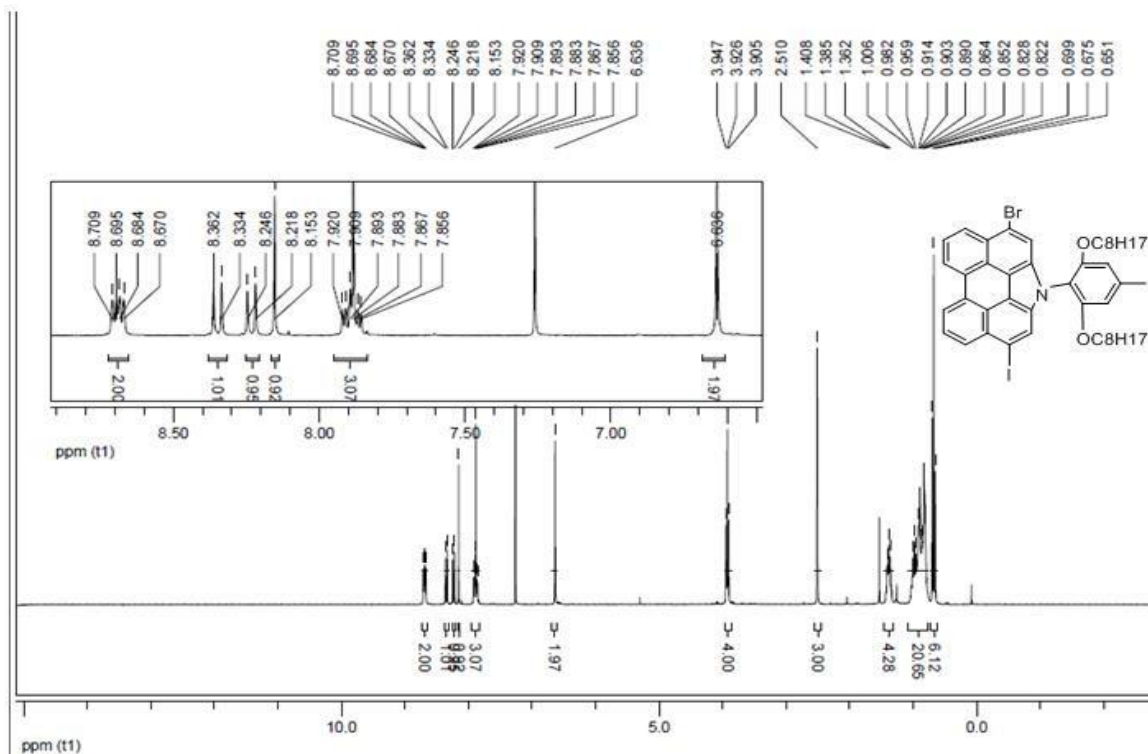

Fig. S9.  $^1\text{H}$  NMR spectrum (300 MHz,  $\text{CDCl}_3$ ) of **6**.

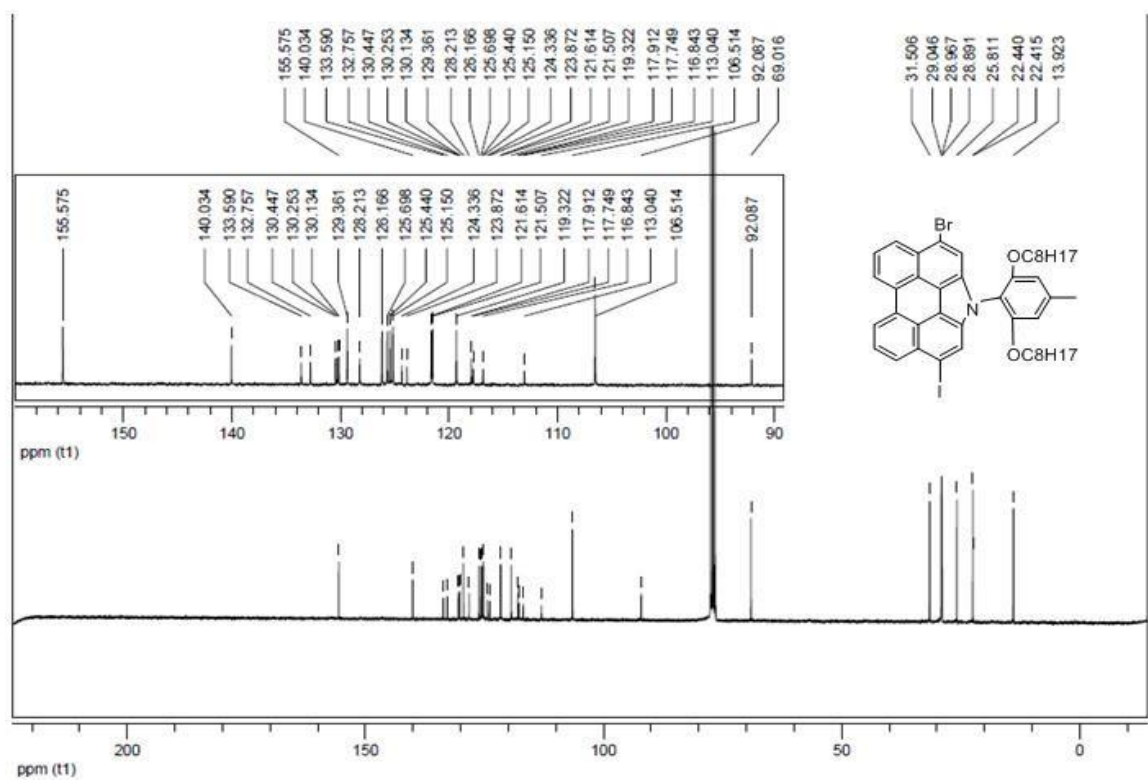

**Fig. S10.**  $^{13}\text{C}$  NMR spectrum (75 MHz,  $\text{CDCl}_3$ ) of **6**.

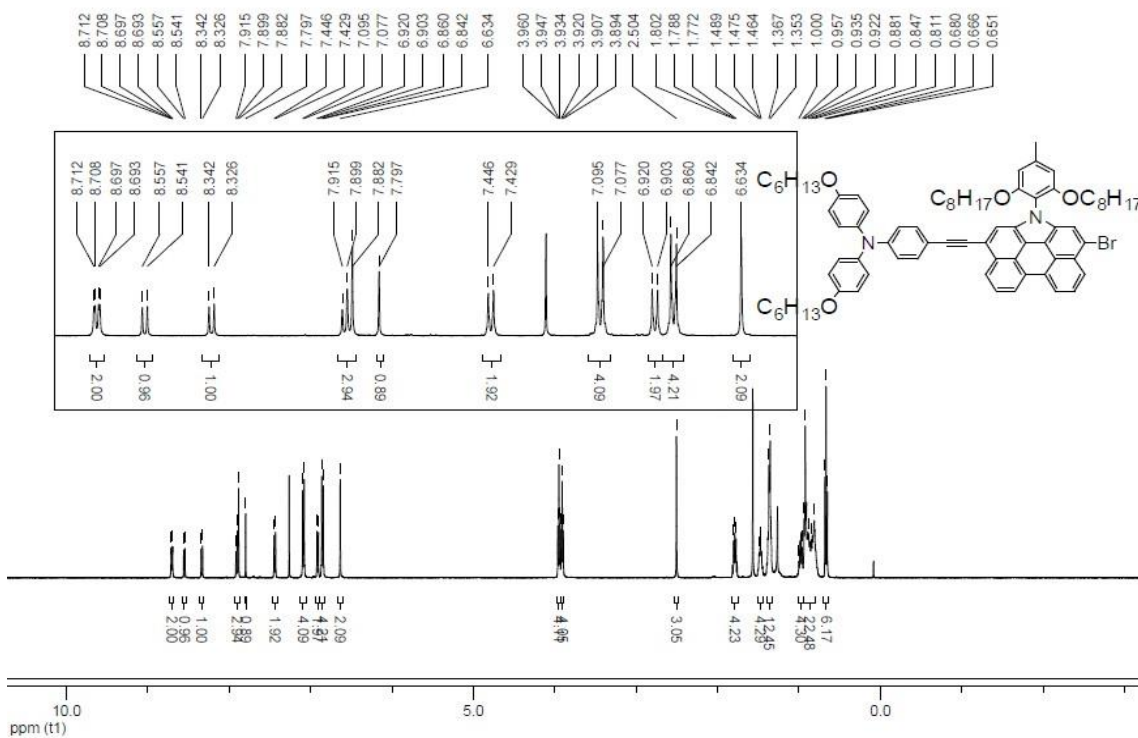



**Fig. S12.**  $^{13}\text{C}$  NMR spectrum (125 MHz,  $\text{CDCl}_3$ ) of **7**.

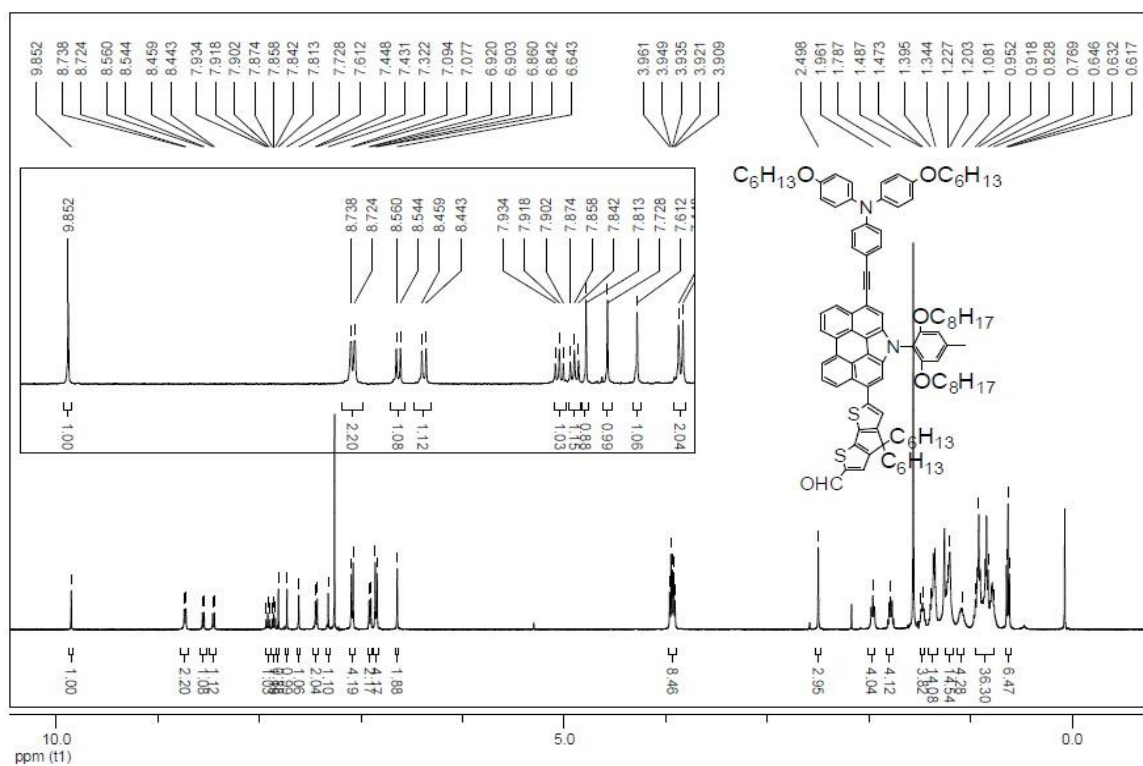

**Fig. S13.**  $^1\text{H}$  NMR spectrum (500 MHz,  $\text{CDCl}_3$ ) of **10**.

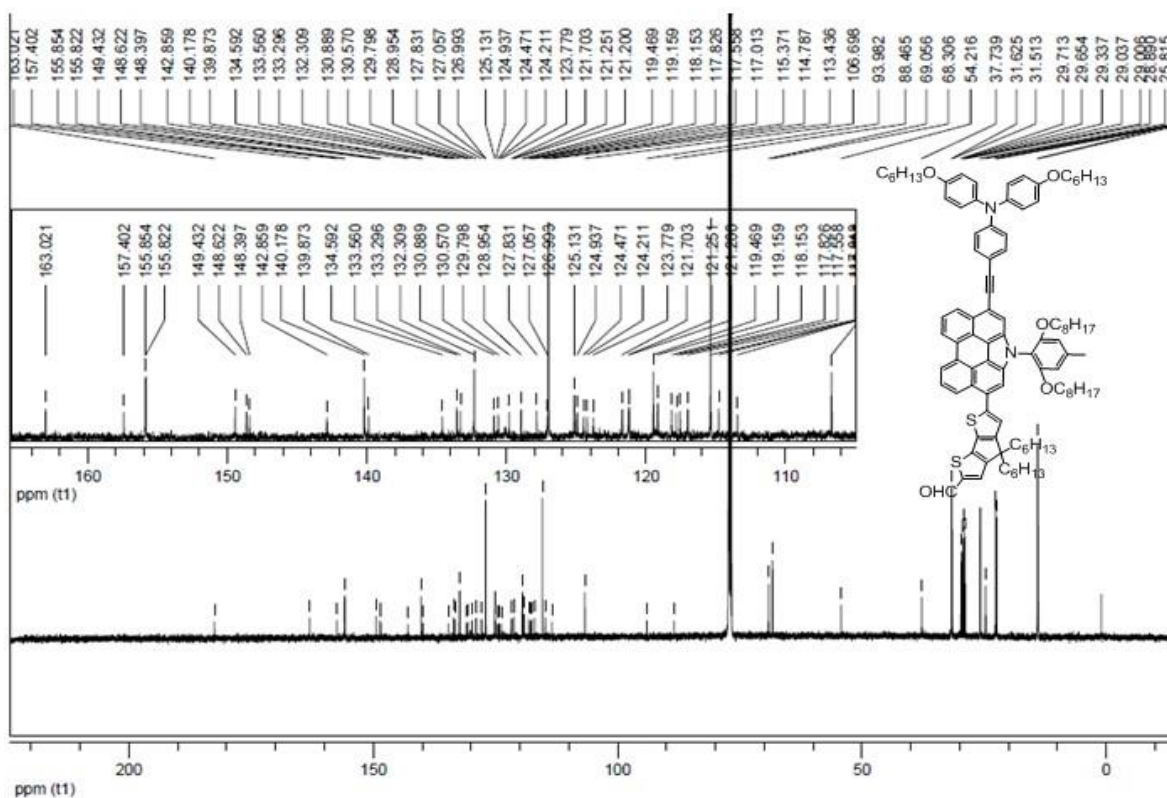

**Fig. S14.**  $^{13}\text{C}$  NMR spectrum (125 MHz,  $\text{CDCl}_3$ ) of **10**.

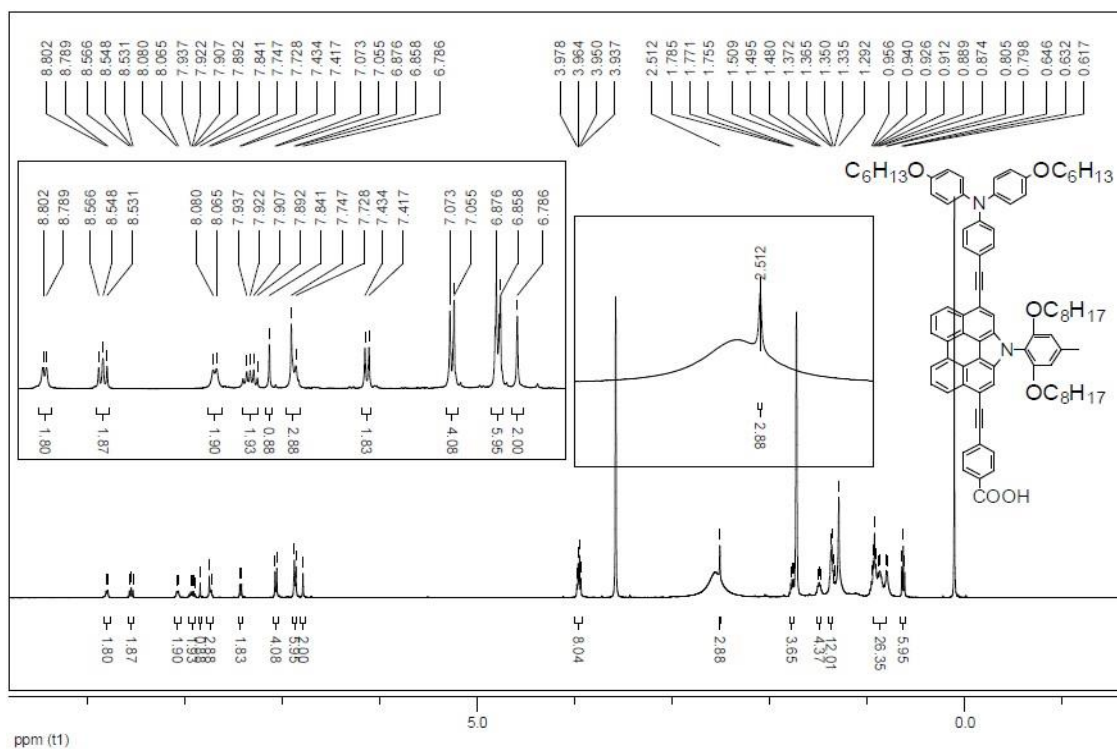

**Fig. S15.**  $^1\text{H}$  NMR spectrum (500 MHz,  $\text{THF-d}_8$ ) of **QB4**.

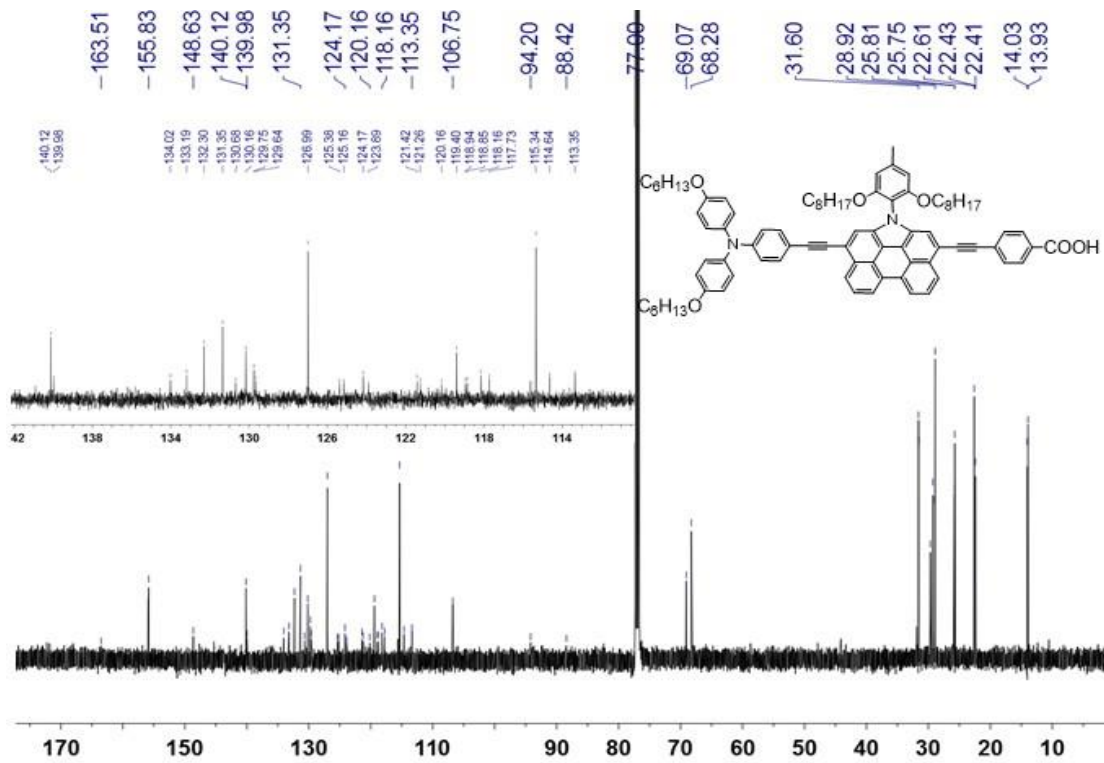



**Fig. S18.**  $^{13}\text{C}$  NMR spectrum (125 MHz,  $\text{CDCl}_3$ ) of **QB5**.

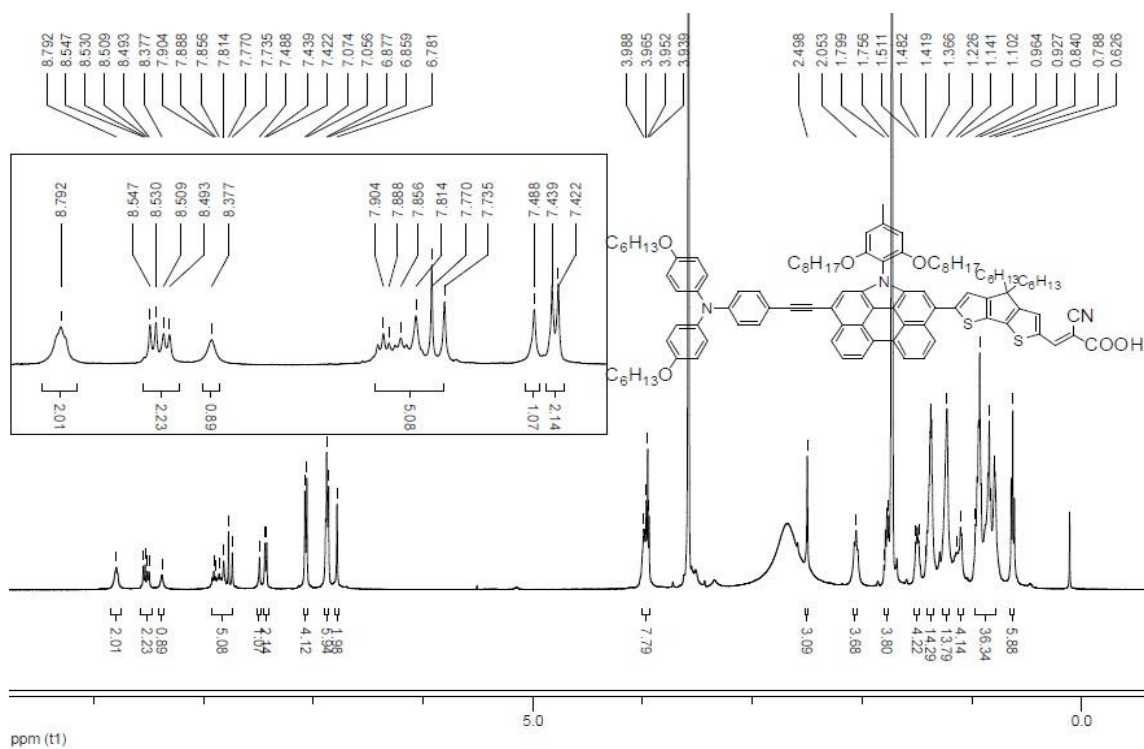

**Fig. S19.**  $^1\text{H}$  NMR spectrum (500 MHz,  $\text{THF-d}_8$ ) of **QB6**.

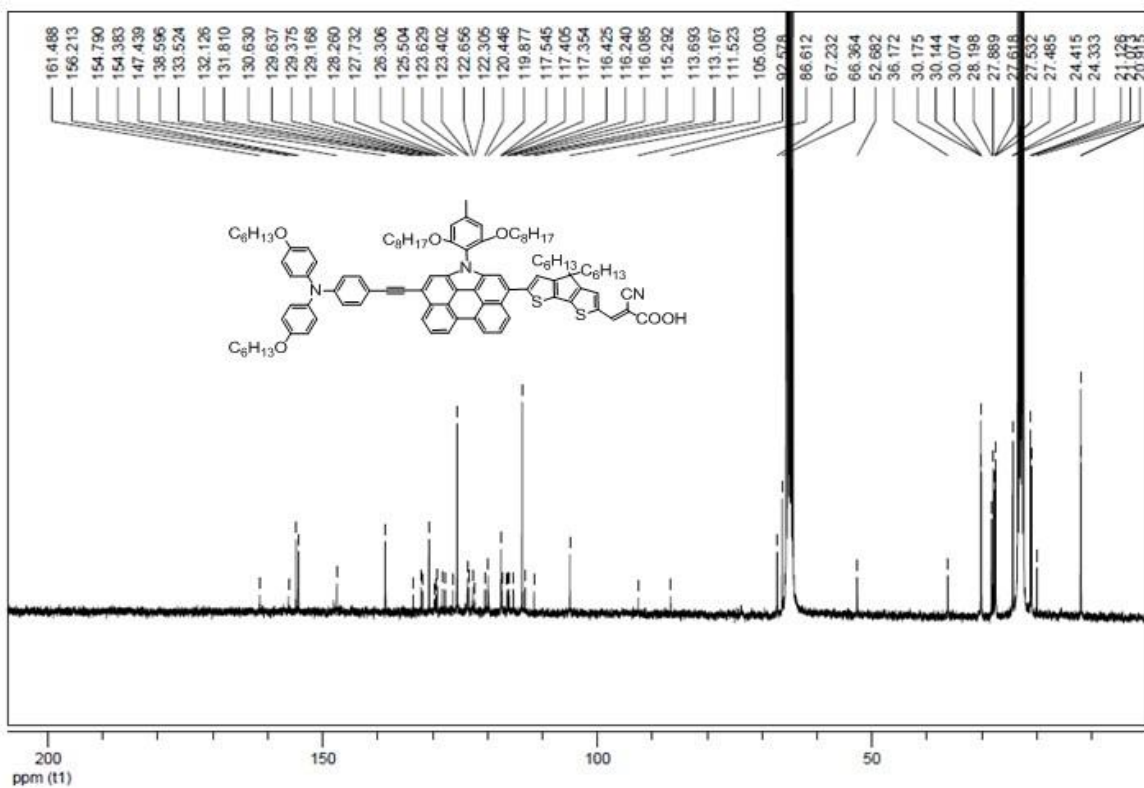

**Fig. S20.**  $^{13}\text{C}$  NMR spectrum (125 MHz, THF- $d_8$ ) of **QB6**.

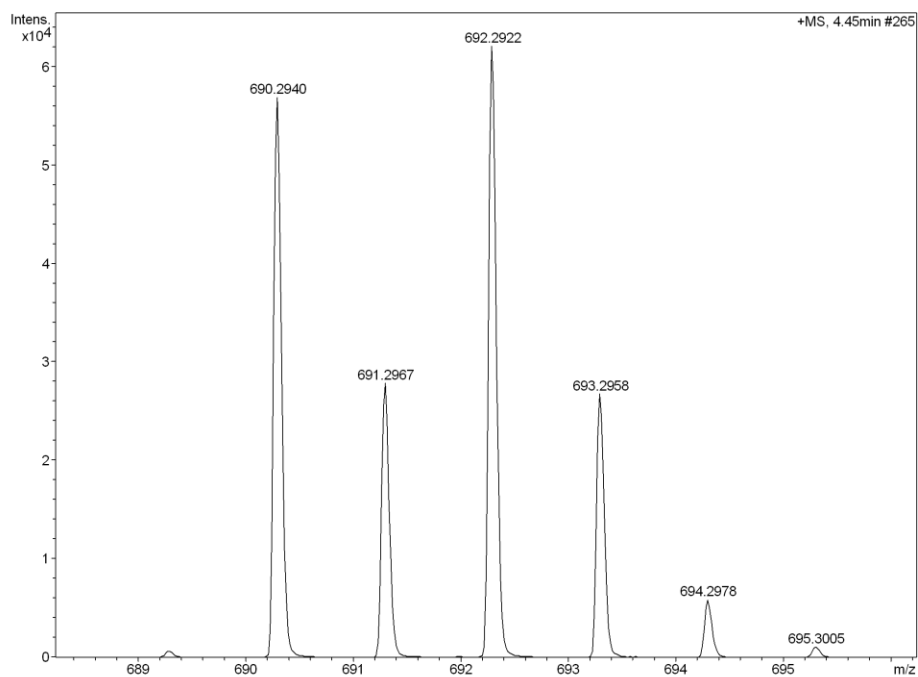

**Fig. S21.** HR mass spectrum (APCI) of compound **5**.

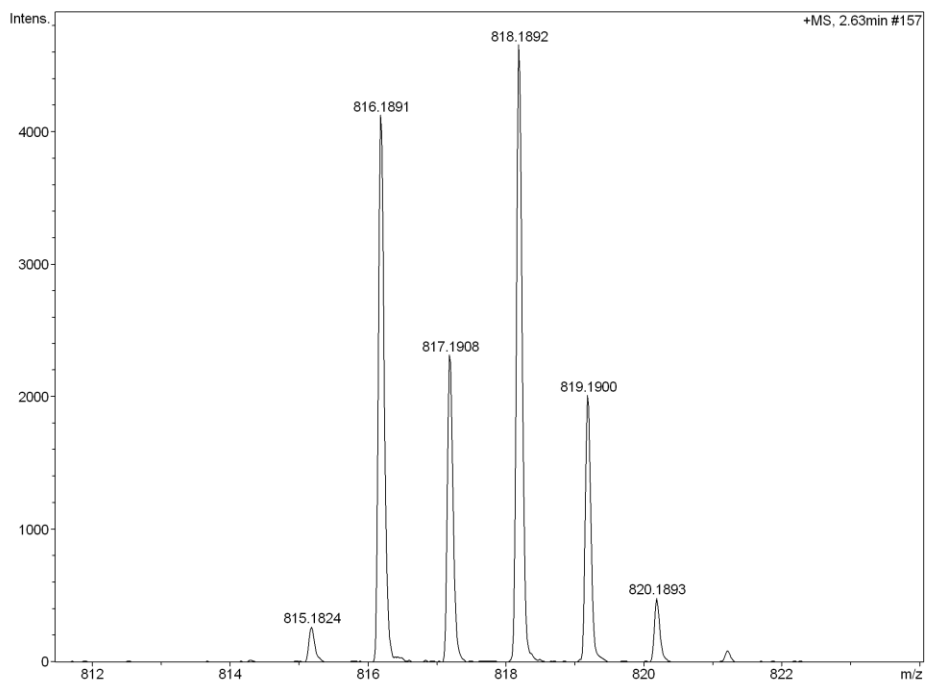

**Fig. S22.** HR mass spectrum (APCI) of compound **6**.

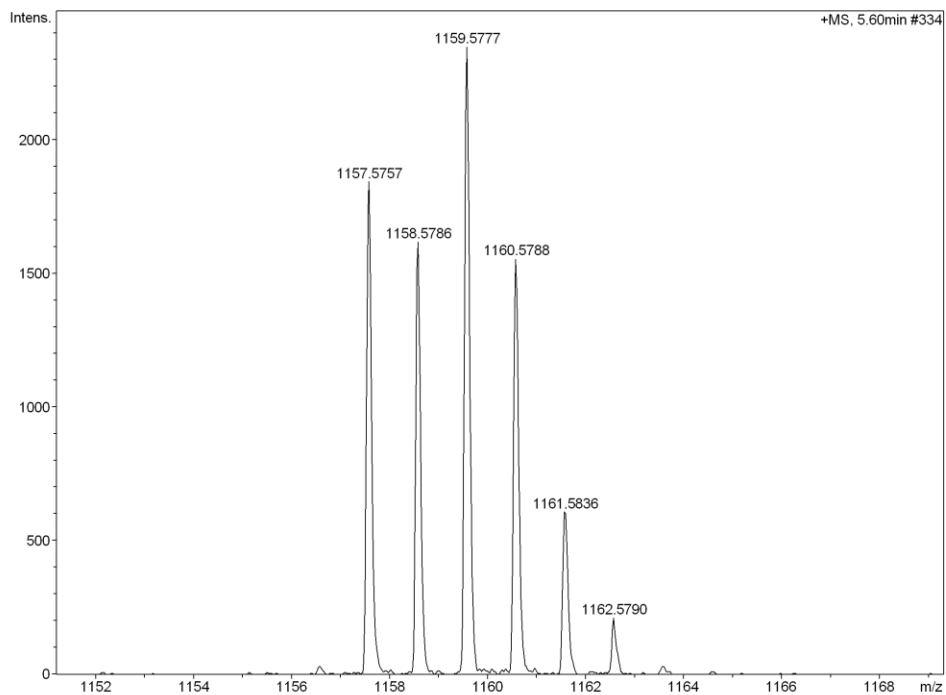

**Fig. S23.** HR mass spectrum (APCI) of compound **7**.

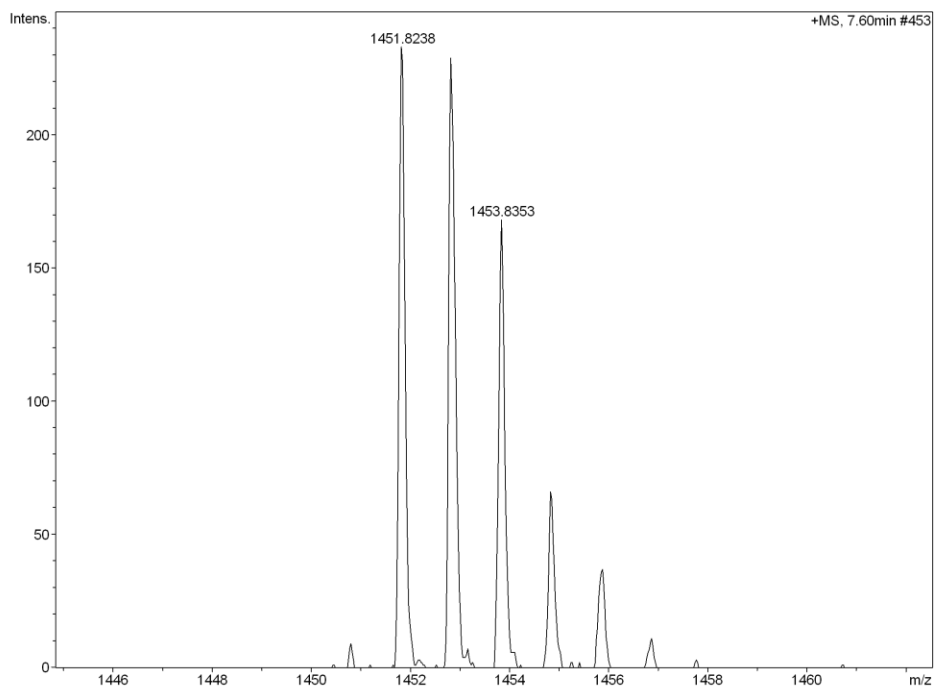

**Fig. S24.** HR mass spectrum (APCI) of compound **10**.

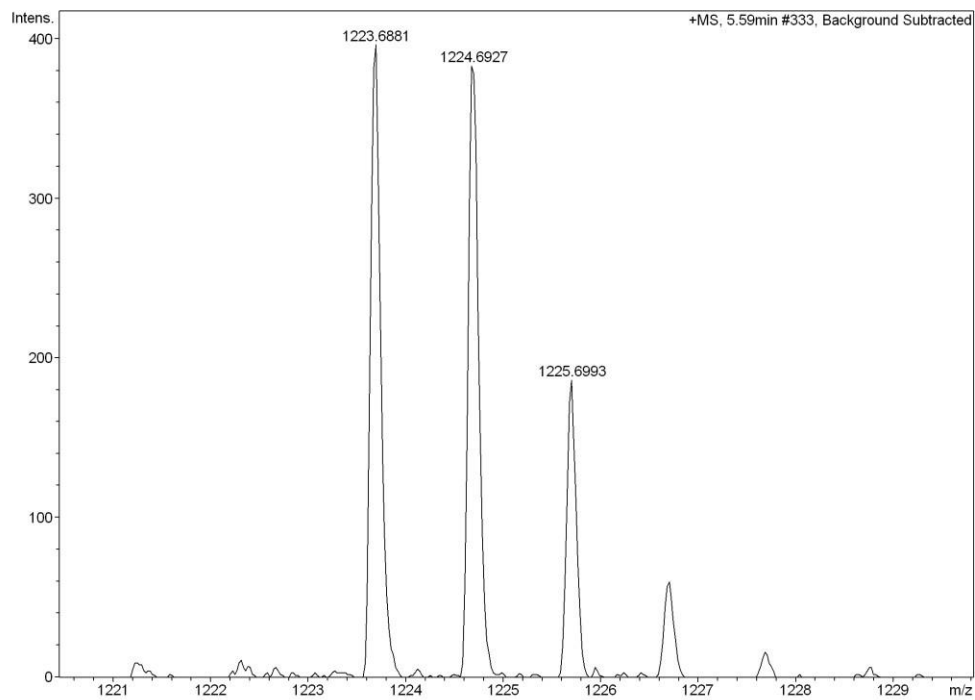

**Fig. S25.** HR mass spectrum (APCI) of compound **QB4**.

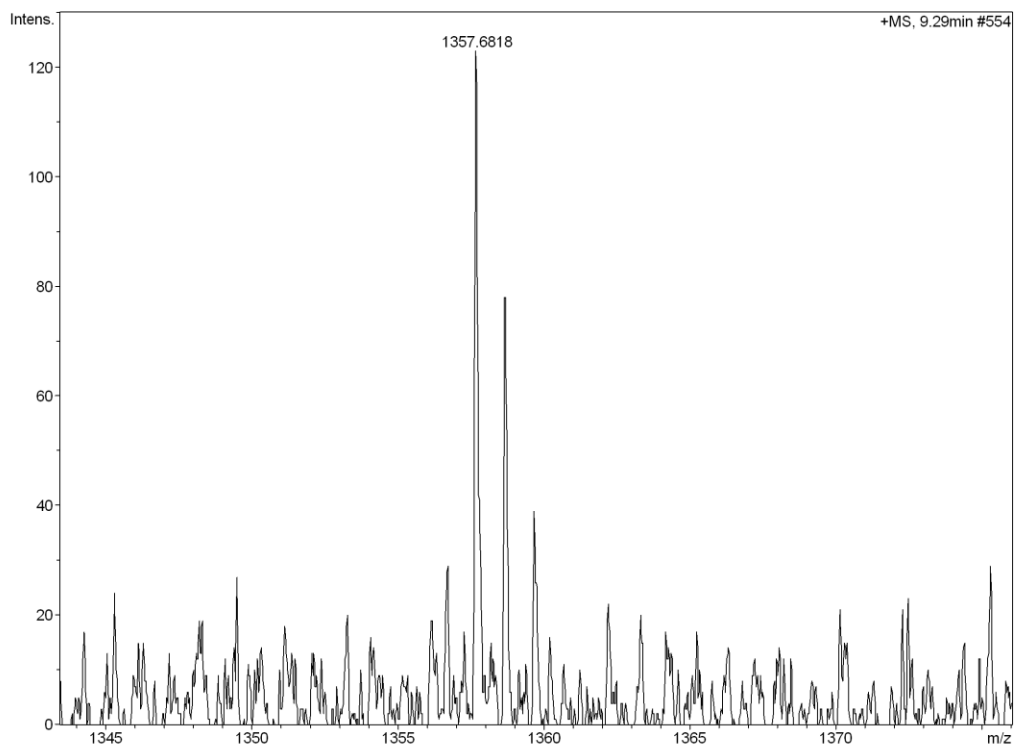

**Fig. S26.** HR mass spectrum (APCI) of compound **QB5**.

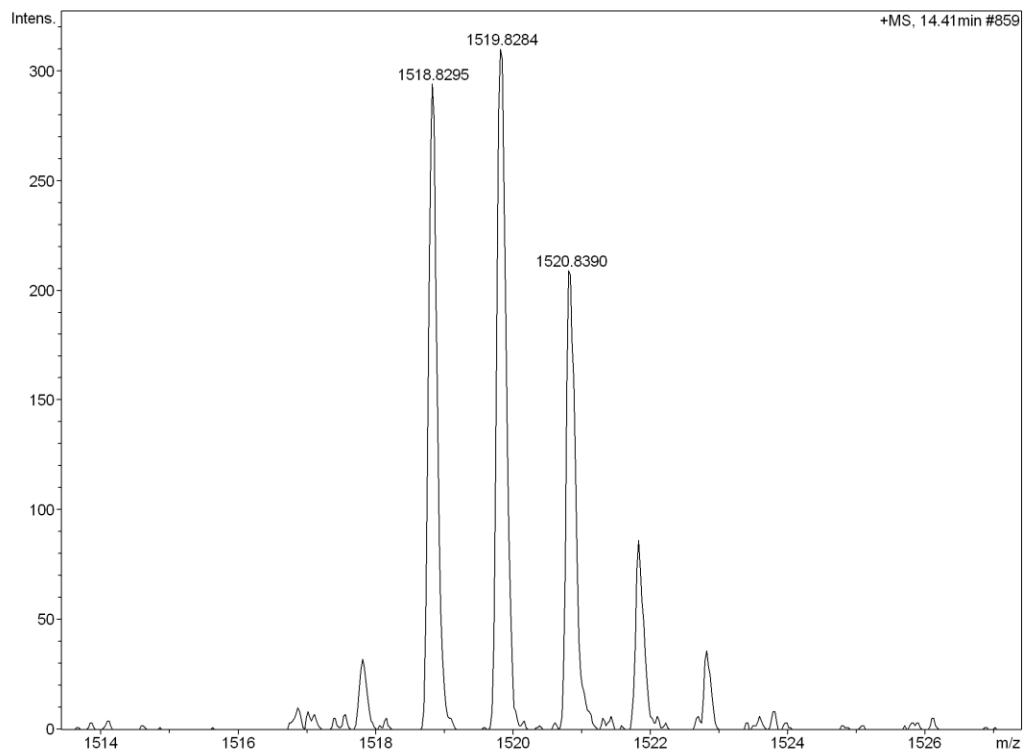

**Fig. S27.** HR mass spectrum (APCI) of compound **QB6**.
